# Supplementary material for: Chiral [16]-ane P4N2macrocycles: stereoselective synthesis and unexpected intermolecular exchange of endocyclic fragments
Source: Royal Society of Chemistry journal article supplement (doi:10.1039/c8dt03214a), 2018-01-01
Supplement: c8dt03214a1.pdf [file c8dt03214a1.pdf]

*Supporting Information*

**Chiral [16]-aneP<sub>4</sub>N<sub>2</sub> macrocycles: stereoselective synthesis and unexpected intermolecular exchange of endocyclic fragments.**

*E. I. Musina,<sup>a\*</sup> R. N. Naumov,<sup>a</sup> K. B. Kanunnikov,<sup>a</sup> A. B. Dobrynin,<sup>a</sup> S. Gómez-Ruiz,<sup>b</sup> P. Lönnecke,<sup>c</sup> E. Hey-Hawkins,<sup>c</sup> A. A. Karasik,<sup>a</sup> O. G. Sinyashin<sup>a</sup>*

<sup>a</sup>A.E. Arbuzov Institute of Organic and Physical Chemistry, Russian Academy of Sciences, Kazan Scientific Center, Arbuzov str. 8, 420088 Kazan, Russian Federation. E-mail: elli@iopc.ru; Fax: +7(843)2732253; Tel: +7(843)2734893

<sup>b</sup>Departamento de Biología y Geología, Física y Química Inorgánica, Universidad Rey Juan Carlos, C/ Tulipán s/n, E-28933 Móstoles (Madrid), Spain.

<sup>c</sup>Faculty of Chemistry and Mineralogy, Institute of Inorganic Chemistry, Leipzig University, Johannisallee 29, D-04103 Leipzig, Germany. E-mail: hey@uni-leipzig.de; Fax: +(0049)3419739319; Tel: +(0049)3419736151

**Table of Contents**

|                                                                                                                                                    |    |
|----------------------------------------------------------------------------------------------------------------------------------------------------|----|
| Experimental part                                                                                                                                  | S2 |
| <sup>31</sup> P spectra illustrating interconversions of chiral 1,9-diaza-3,7,11,15-tetraphosphacyclohexadecanes in acidic media (Figures S1 – S2) | S3 |
| <sup>31</sup> P spectra illustrating stability of chiral 1,9-diaza-3,7,11,15-tetraphosphacyclohexadecanes in basic media (Figures S3 – S4)         | S5 |
| <sup>31</sup> P spectra illustrating the component composition after dissolution of <b>1RS</b> and equimolar mixture of <b>1S</b> + <b>1R</b>      | S6 |

## Experimental part

### Equilibration of **1R** in the acidic or basic media.

In a typical experiment, compound **1R** was accurately weighed into an NMR tube and dissolved in benzene- $d_6$  (0.5 mL).  $^{31}\text{P}\{^1\text{H}\}$  NMR spectrum of sample was immediately registered. Then 0.1 ml of corresponding acetic acid solution (0.1 % or 10 %) or 0.05 ml of  $\text{NEt}_3$  or 0.05 ml of  $\text{NaOH}$  in ethanol was accurately added to sample by microsyringe. The solution was monitored by  $^{31}\text{P}$  NMR spectroscopy up to the equilibrium achievement (the amount of peaks and integral intensity ratio retained unchanged).

The experimental spectra are presented in figs. S1 – S4

### Equilibration of **1RS** and mixture of **1R** and **1S**.

Compound **1RS** (0.01 g) was accurately weighed into an NMR tube and dissolved in benzene- $d_6$  (0.5 mL).  $^{31}\text{P}\{^1\text{H}\}$  NMR spectrum of sample was immediately registered. The solution was monitored by  $^{31}\text{P}$  NMR spectroscopy up to the equilibrium achievement (the amount of peaks and integral intensity ratio retained unchanged) (Figures S5, S6).

Macrocycles **1R**<sup>1</sup> (0.01 g) and **1S**<sup>1</sup> (0.01 g) were weighed into an NMR tube and dissolved in benzene- $d_6$  (0.5 mL). The solution was monitored by  $^{31}\text{P}$  NMR spectroscopy up to the equilibrium achievement (the amount of peaks and integral intensity ratio retained unchanged) (Figure S6).

**$^{31}\text{P}$  spectra illustrating interconversions of chiral 1,9-diaza-3,7,11,15-tetraphosphacyclohexadecanes in acidic media**

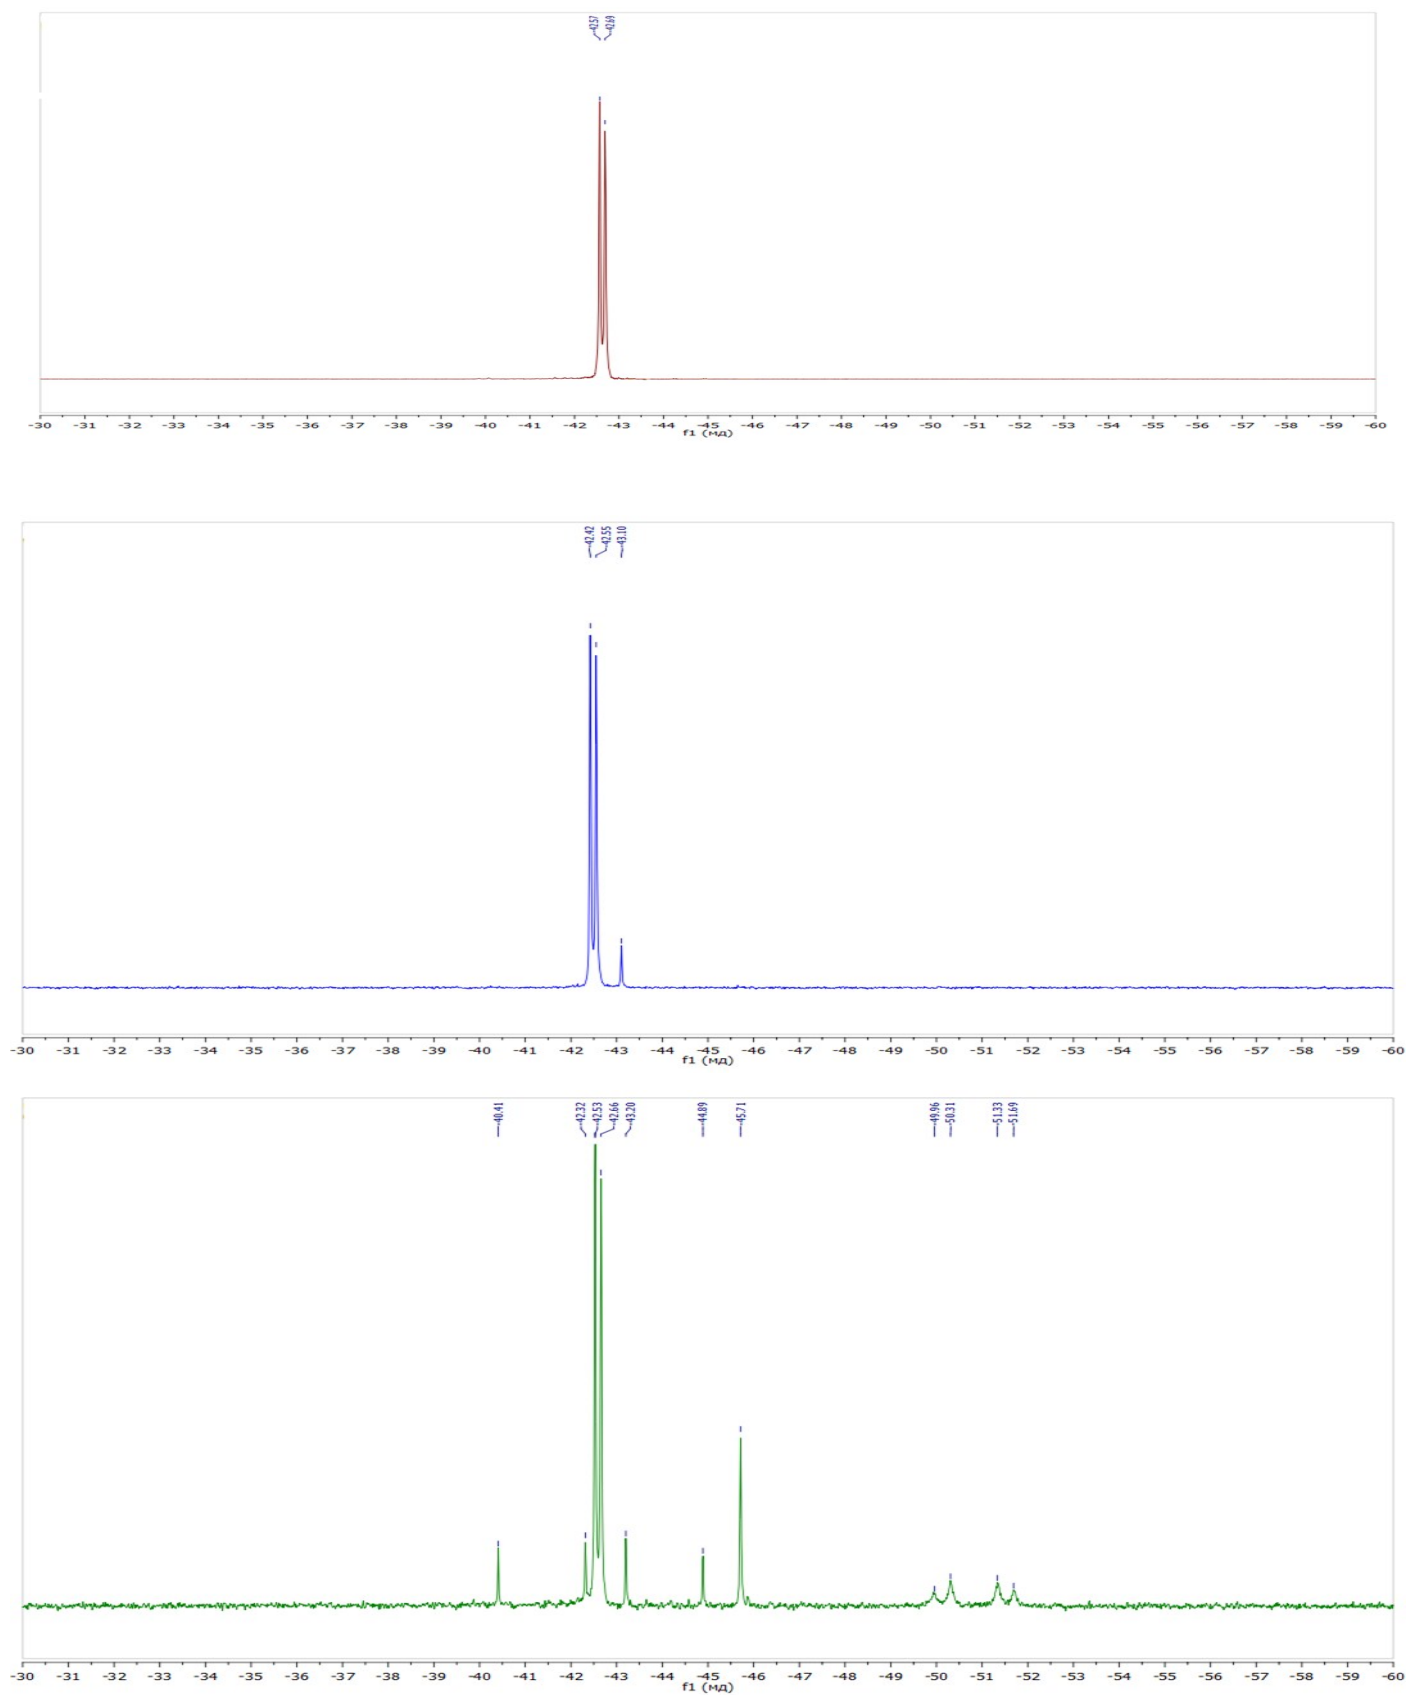

**Figure S1.** Evolution of **1R** after addition of 0.1 mL of a 0.1 % acetic acid in benzene (solvent:  $\text{C}_6\text{D}_6$ ,  $V=0.5$  mL,  $c = 0.01$  g/mL).  $^{31}\text{P}\{^1\text{H}\}$  NMR spectra without acetic acid (red); measured 40 minutes after preparing of the sample (blue); measured 44 hours after preparing of the sample (green).

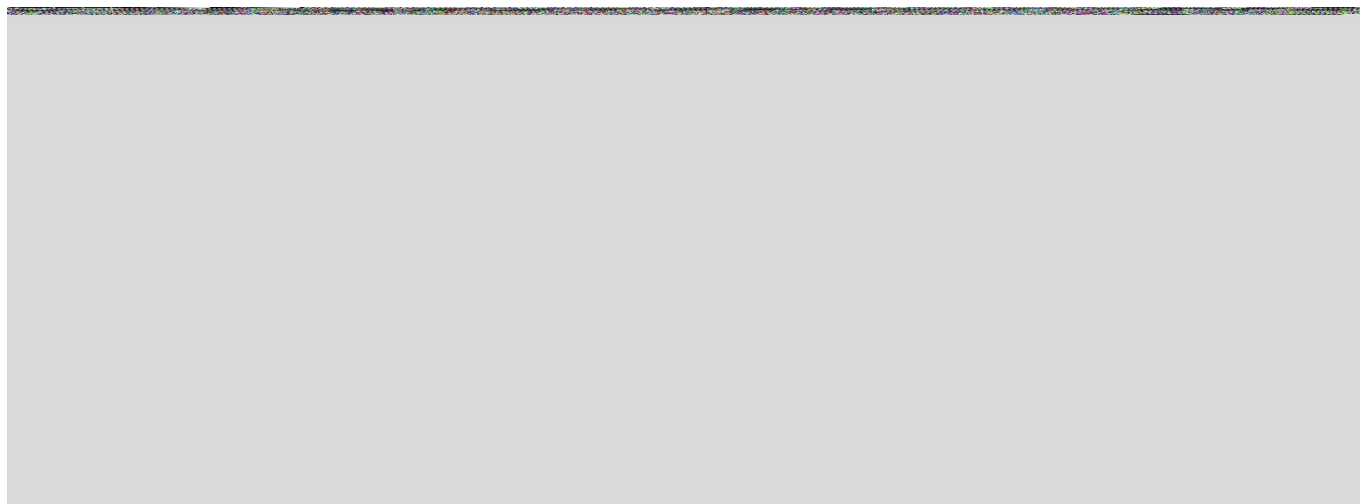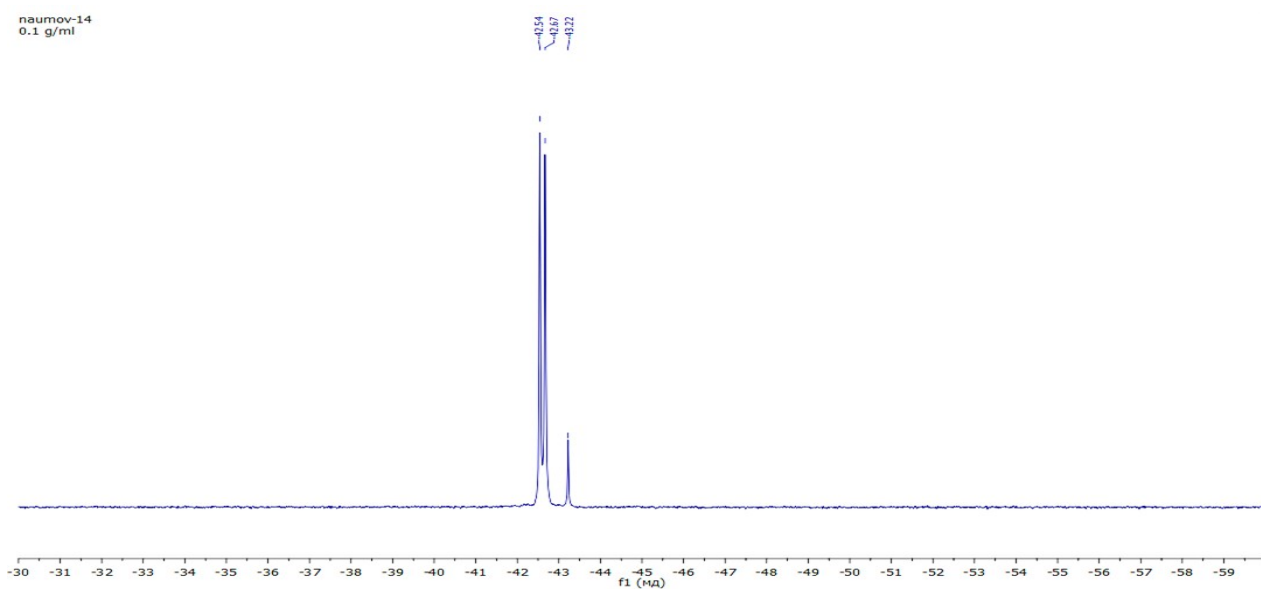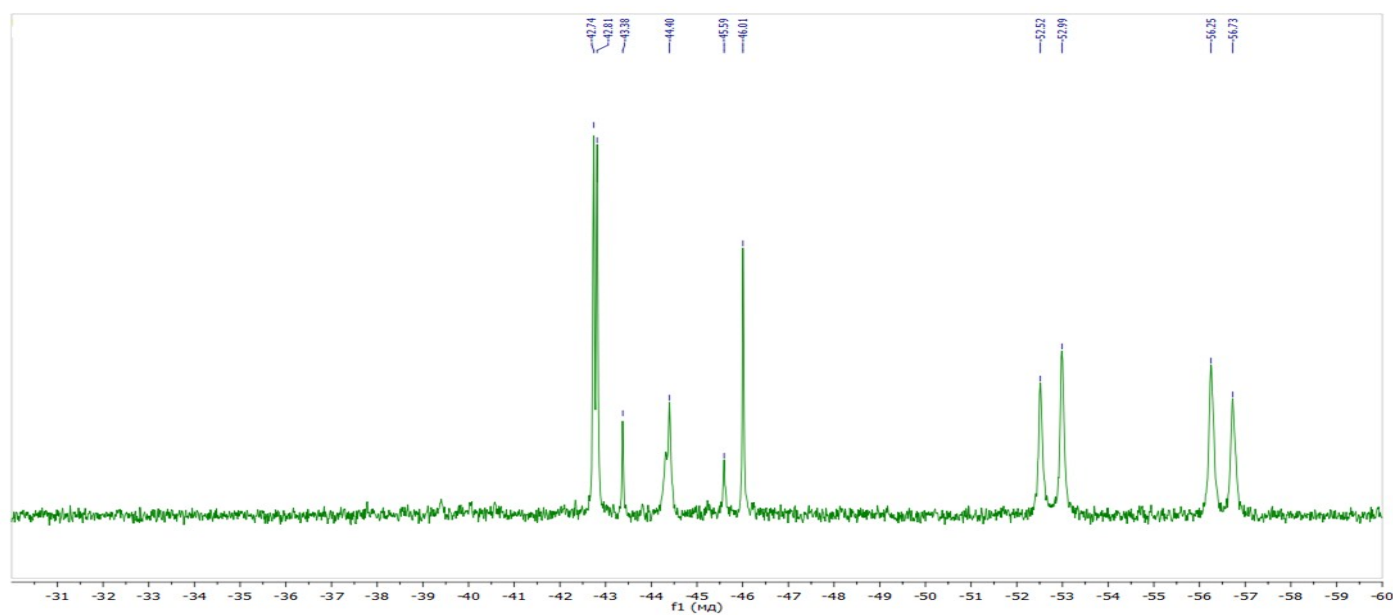

**Figure S2.** Evolution of **1R** after addition of 0.1 mL of a **10%** acetic acid in benzene (solvent:  $C_6D_6$ ,  $V=0.5$  mL,  $c = 0.01$  g/mL).  $^{31}P\{^1H\}$  NMR spectra without acetic acid (red); measured 5 minutes after preparing of the sample (blue); measured 23 minutes after preparing of the sample (green).

**$^{31}\text{P}$  spectra illustrating stability of chiral 1,9-diaza-3,7,11,15-tetraphosphacyclohexadecanes in basic media**

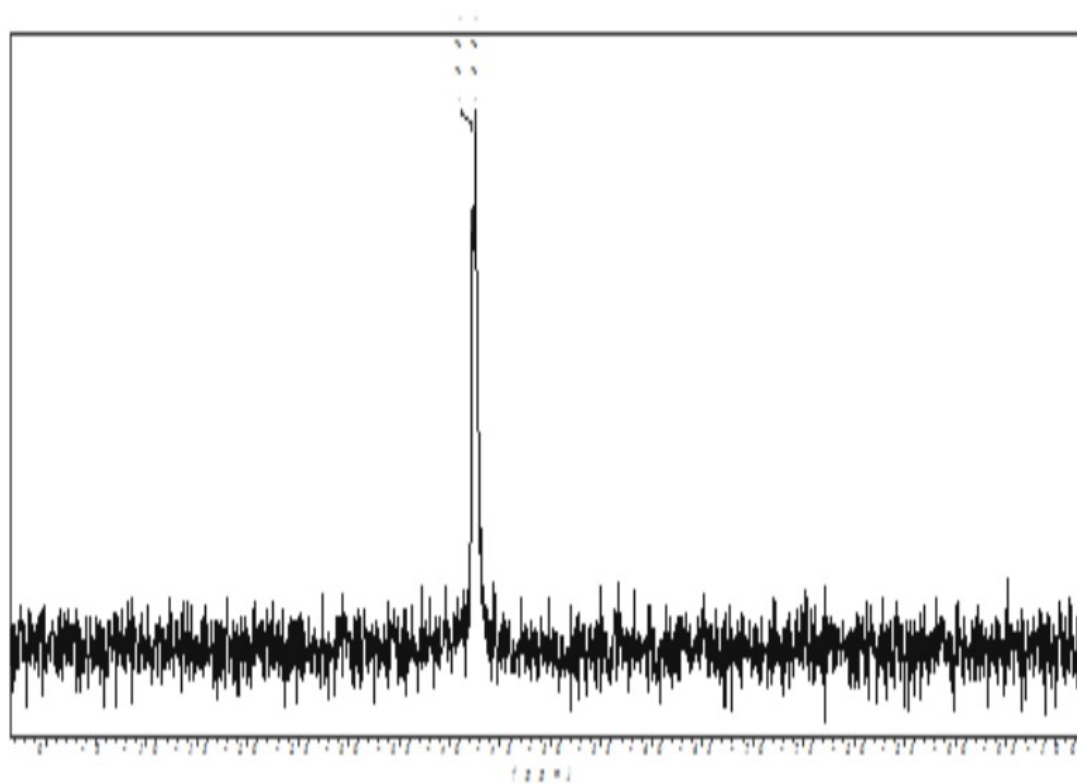

**Figure S3.**  $^{31}\text{P}\{^1\text{H}\}$  NMR spectrum of **1R** (solvent:  $\text{C}_6\text{H}_6$ ,  $V=0.5$  mL,  $c = 0.01$  g/mL) and NaOH (solvent: ethanol,  $V=0.05$  mL,  $c = 0.1$  g/mL) measured 166 hours after preparing of the sample.

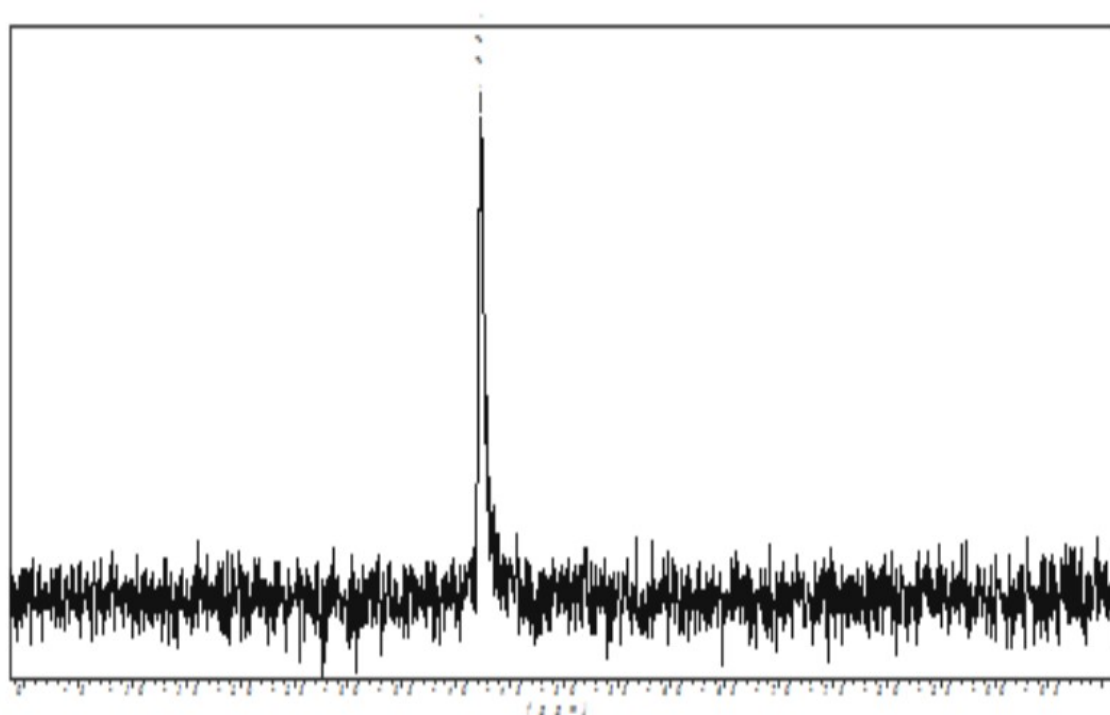

**Figure S4.**  $^{31}\text{P}\{^1\text{H}\}$  NMR spectrum of **1R** (solvent:  $\text{C}_6\text{H}_6$ ,  $V=0.5$  mL,  $c = 0.01$  g/mL) and triethylamine ( $V=0.05$  mL) measured 218 hours after preparing of the sample.

**$^{31}\text{P}$  spectra illustrating the component composition after dissolution of  
 $1RS$  and equimolar mixture of  $1S + 1R$**

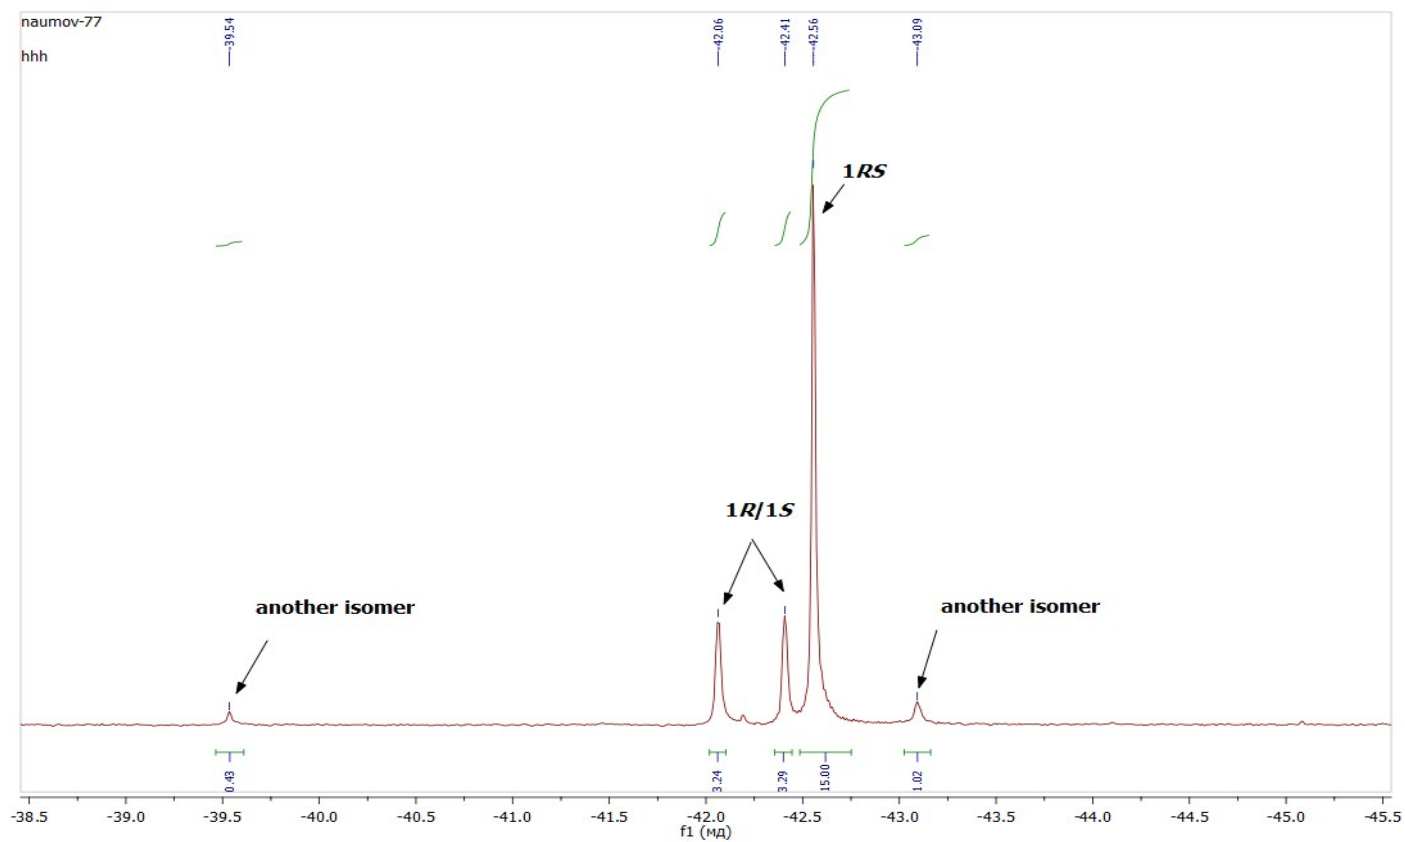

**Figure S5.**  $^{31}\text{P}\{^1\text{H}\}$  NMR spectrum of  $1RS$  in  $\text{CDCl}_3$  measured **10 minutes** after dissolution of the sample.

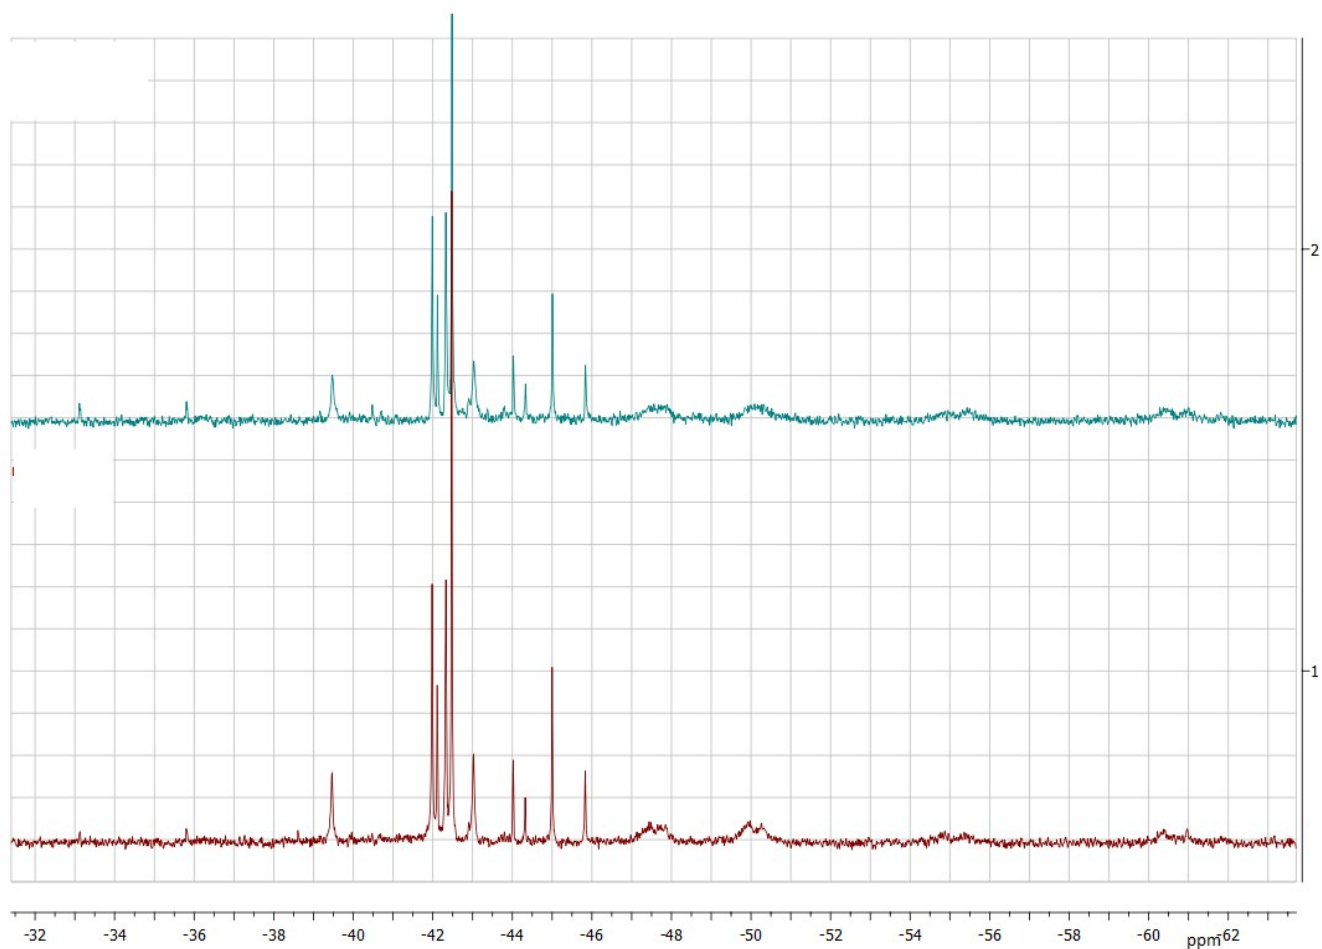

**Figure S6.**  $^{31}\text{P}\{^1\text{H}\}$  NMR stack plot spectra of **1RS** in  $\text{CDCl}_3$  measured **97 hours** after dissolution of the sample (blue) and the mixture, consisting of the equimolar quantity of **1S** and **1R** in  $\text{CDCl}_3$  (measured **67 hours** after dissolution of the sample) (red).

## References

1. R.N. Naumov, A.A. Karasik, K.B. Kanunnikov, A.V. Kozlov, Sh.K. Latypov, K.V. Domasevitch, E. Hey-Hawkins, O.G. Sinyashin, *Mendeleev Commun.*, 2008, **18**, 80.
